# Supplementary material
Source: Springer Nature journal article supplement (https://www.springermedizin.de/resource/supplementary/12943_2010_794_MOESM11_ESM.pdf/9554852)
Supplement: MOESM11 [file 9554852]

SW13

SK-MEL5

SPARC  
MMP1  
ECM1

E-cadherin  
MMP2  
CD44

MMP9 COL5 $\alpha$ 1  
MMP10 COL8 $\alpha$ 1  
MMP14 LAMA2  
TIMP2 COL15 $\alpha$ 1  
TIMP3 LAMA3  
ITG $\alpha$ 3 THBS3  
ITG $\alpha$ 7 CTNND2  
MCAM

MMP1 ITG $\beta$ 3 THBS1  
MMP16 SPP1
